# Supplementary material for: Reactive Cellu-mers—A Novel Approach to Improved Cellulose/Polymer Composites
Source: MDPI journal article supplement (doi:10.3390/polym14091670), 2022-04-20
Supplement: s1 [file s1]

# Reactive 'Cellu-mers' – a Novel Approach to Improved Cellulose/Polymer Composites

Dariya Getya,<sup>1,2</sup> Ivan Gitsov<sup>1,2,3</sup>

<sup>1</sup> Department of Chemistry, State University of New York – ESF, Syracuse, NY 13210

<sup>2</sup> The Michael M. Szwarc Polymer Research Institute, Syracuse, NY 13210

<sup>3</sup> The BioInspired Institute, Syracuse University, Syracuse, NY 13244, USA

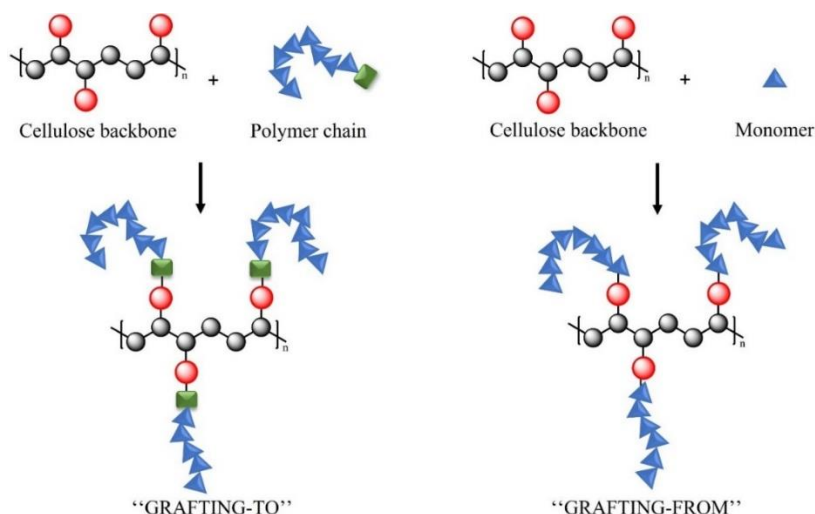

**Figure S1.** Schematic representation of the cellulose grafting approaches: "grafting-to" and "grafting-from". Red circles represent available reactive groups on cellulose chain, and green squares represent the reactive polymer chain end.

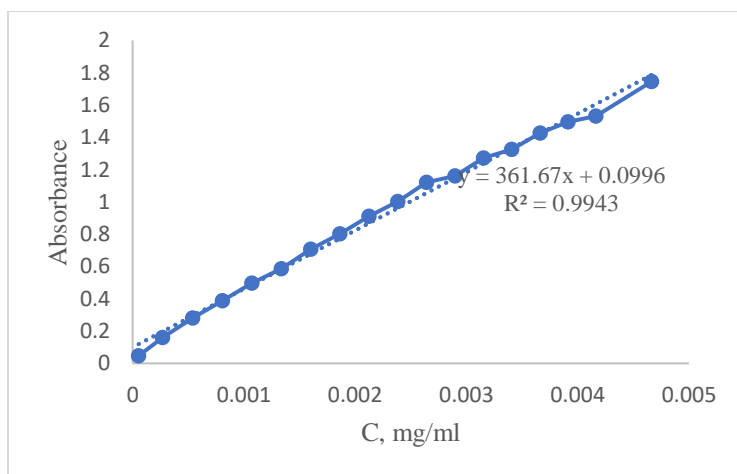

**Figure S2.** Calibration curve used to calculate the degree of substitution of St-modified compounds. 4-vinylbenzyl chloride UV-VIS absorbance at 265 nm was used.

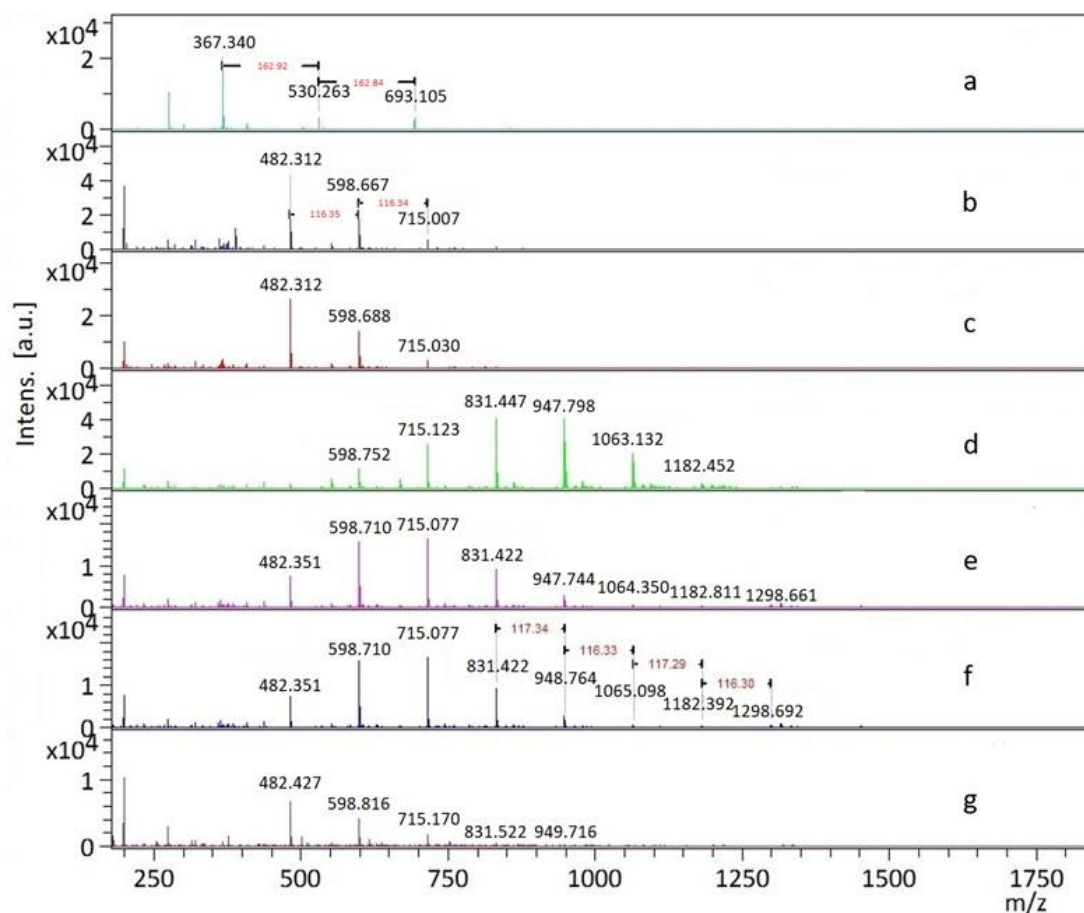

**Figure S3.** MALDI-TOF spectra of cellobiose-m obtained with various molar equivalents of 4-VBC at 25°C for 22 h. a) starting cellobiose; b-g) with added 1, 2, 4, 6, 8 and 30 equivalents of 4-VBC, respectively. DHB was used as a matrix.

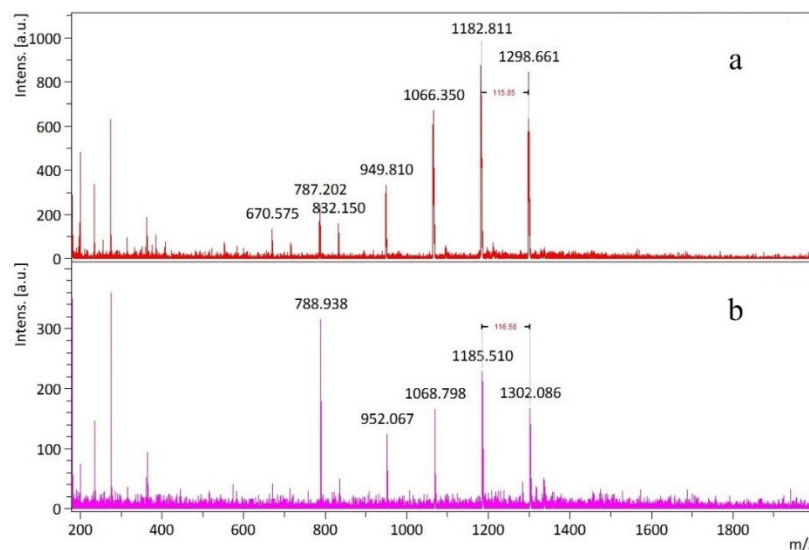

**Figure S4.** MALDI-TOF spectra of cellobiose-m with 4-VBC added at a) room temperature; b) 100°C. Reaction time 22 h, DHB used as a matrix.

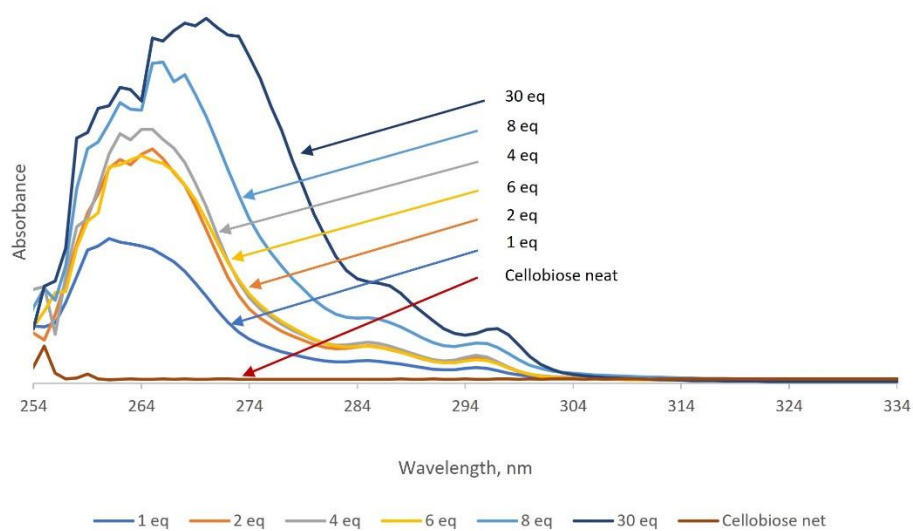

**Figure S5.** UV-Vis absorption spectra of cellobiose-m. Absorbance is increasing with the increase in number of molar equivalents of the 4-vinylbenzyl chloride used for modification:1-6) 1, 2, 4, 6, 8 and 30 equivalents of 4-VBC, respectively; spectrum of pure cellobiose (0 equivalents) is also included.

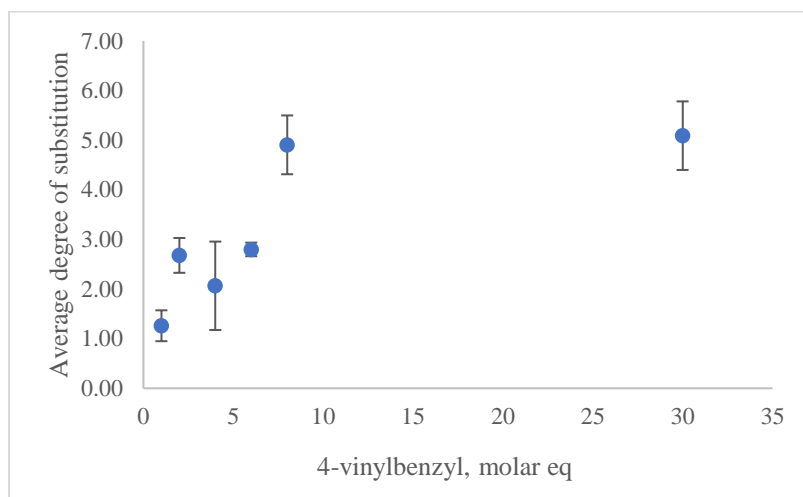

**Figure S6.** Degree of substitution of cellobiose-m at various 4-VBC molar equivalents. Calculated using the UV calibration curve at 265 nm (Figure S2).

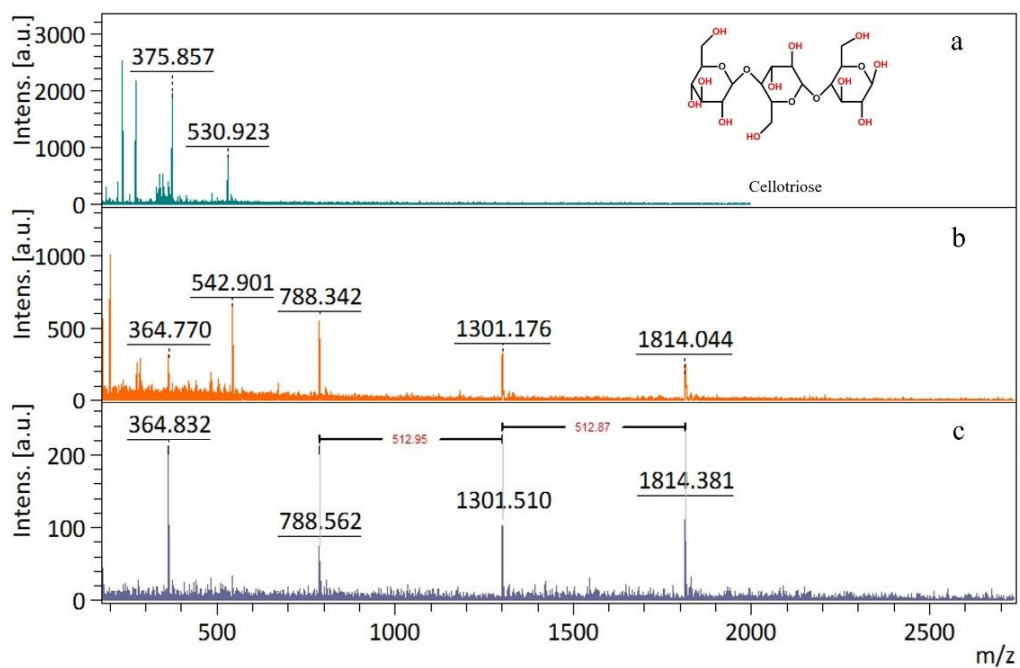

**Figure S7.** MALDI-TOF spectra of cellotriose modification. a) net cellotriose; b) cellotriose reaction mixture after 16 h of the reaction; c) modified cellotriose after 24 h of the reaction. DHB was used as the matrix.

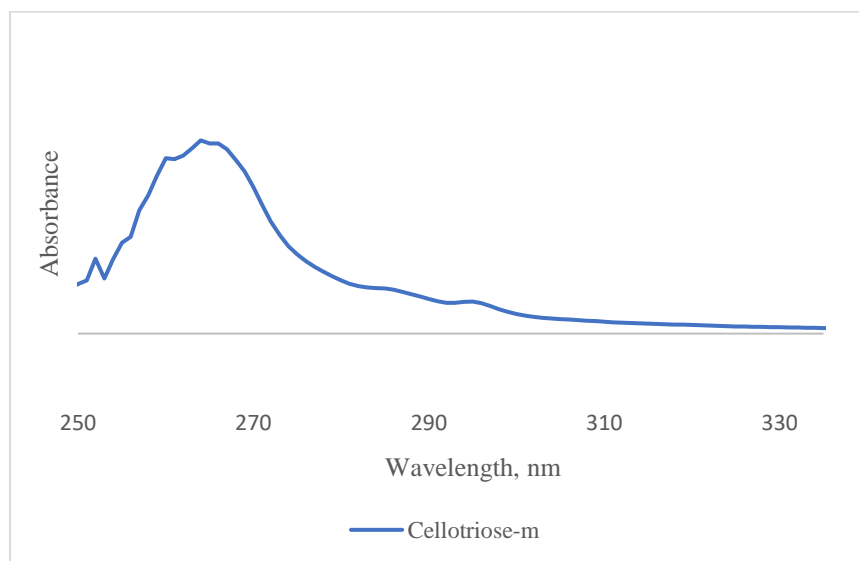

**Figure S8.** UV-Vis absorption spectrum of modified cellotriose. DS was calculated using the UV calibration curve at 265 nm (Figure S2).

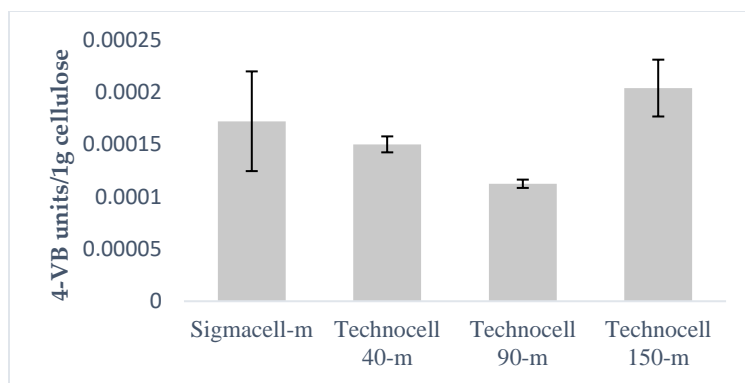

**Figure S9.** Calculated amount of the number of 4-VBC groups attached to 1g of cellulose using four different types of cellulose. Values were calculated using the calibrated UV-Vis absorbance at 265 nm.

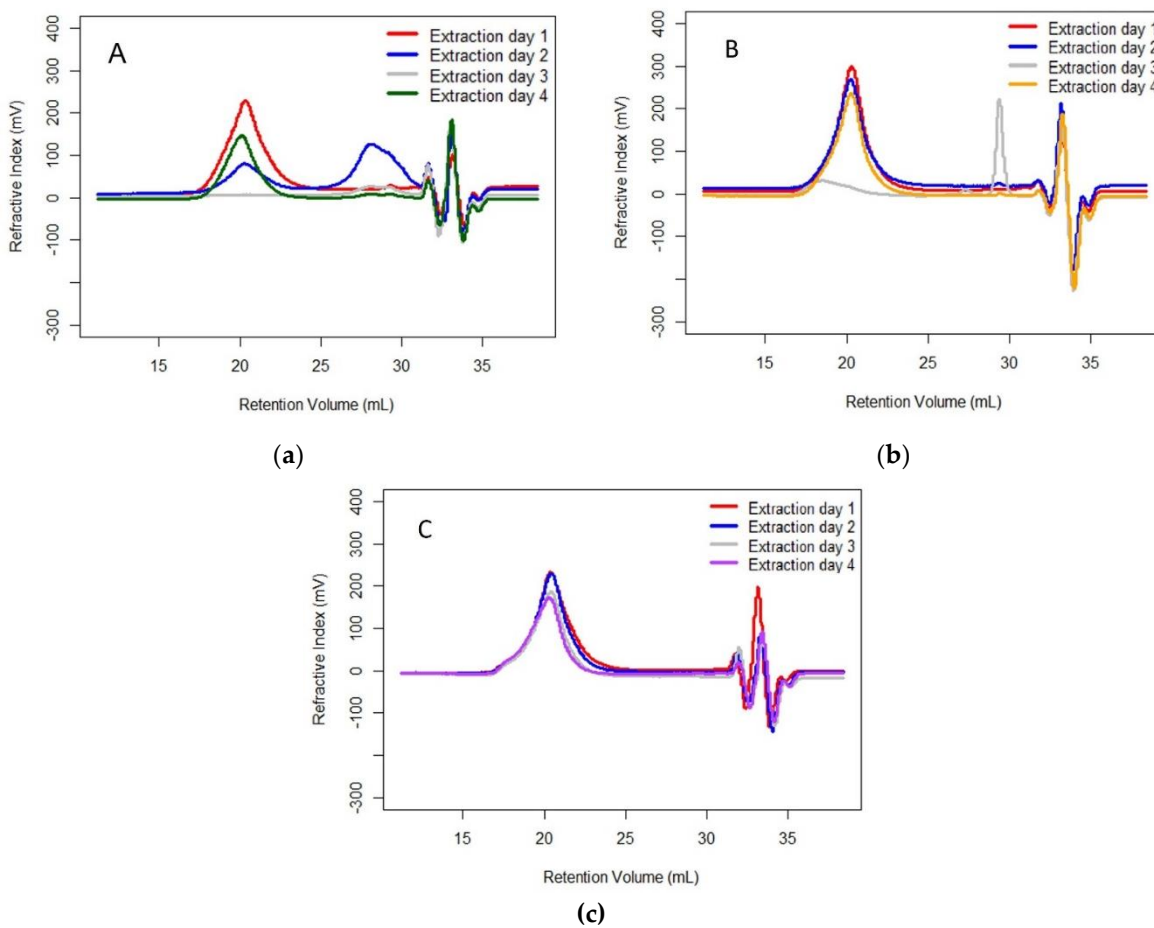

**Figure S10.** SEC chromatograms of PSt samples extracted from cellobiose-m (A), cellotriose-m (B) and Sigmacell-m (C) based semi-IPNs.

**Table S1.** Molecular mass and dispersity index ( $\bar{D}$ ) of non-crosslinked PSt extracted from cellobiose-m (CB-PSt), cellotriose-m (CTR-PSt), Sigmacell-m (CELL-PSt) gels and of PSt polymerized in a presence of a non-modified carbohydrate filler.

| PSt network    | Mn, kDa | $\bar{D}$ |
|----------------|---------|-----------|
| CB-PSt         |         |           |
| Day 1          | 70,500  | 3.04      |
| Day 2          | 65,000  | 3.17      |
| Day 3          | 155,000 | 5.58      |
|                | 1,800   | 1.04      |
|                | 360     | 1.07      |
| Day 4          | 76,000  | 2.99      |
| CTR-PSt        |         |           |
| Day 1          | 55,500  | 3.55      |
|                | 386     | 1.07      |
| Day 2          | 60,000  | 3.03      |
|                | 460     | 2.56      |
| Day 3          | 570     | 1.87      |
| Day 4          | 81,000  | 2.65      |
| CELL-PSt, 1w%  |         |           |
| Day 1          | 50,000  | 5.01      |
| Day 2          | 64,000  | 3.99      |
| Day 3          | 79,000  | 3.77      |
| Day 4          | 98,000  | 3.49      |
| CELL-PSt, 5w%  |         |           |
| Day 1          | 47,800  | 6.1       |
| CELL-PSt, 10w% |         |           |
| Day 1          | 32,500  | 4.24      |
| Mixtures       |         |           |
| PSt/CB         | 60,300  | 2.10      |
| PSt/CTR        | 76,000  | 1.60      |
| PSt/CELL       | 51,500  | 2.10      |

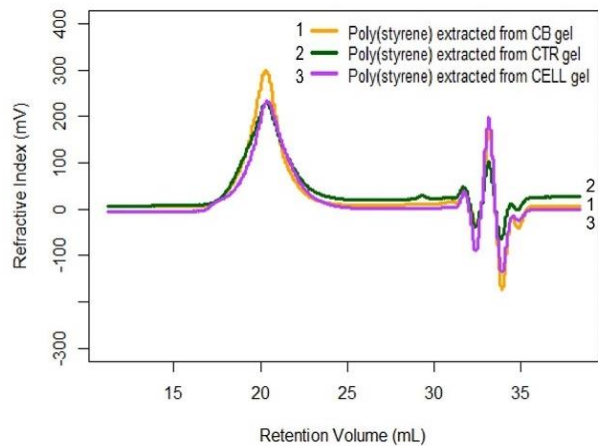

**Figure S11.** SEC chromatograms of poly(styrene) samples extracted after 24 h from (1) cellobiose-m (CB- gel), (2) cellotriose-m (CTR- gel), and (3) Sigmacell-m (CELL- gel) based networks.

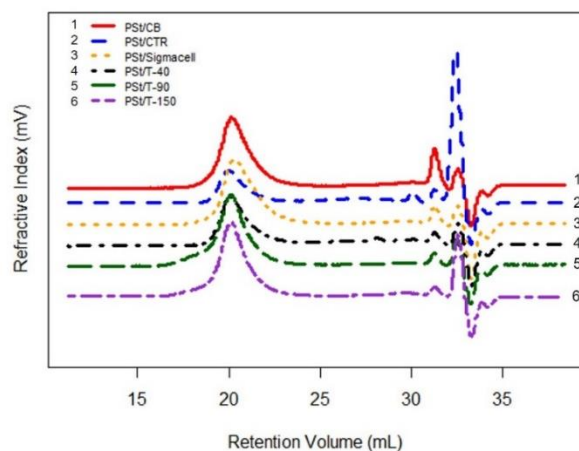

**Figure S12.** SEC chromatograms of PSt formed in the presence of non-modified fillers. 1) PSt formed in the presence of cellobiose; 2) PSt formed in the presence of cellotriose; 3) PSt formed in the presence of Sigmacell cellulose; 4) PSt formed in the presence of T-40 cellulose; 5) PSt formed in the presence of T-90 cellulose; 6) PSt formed in the presence of T-150 cellulose.

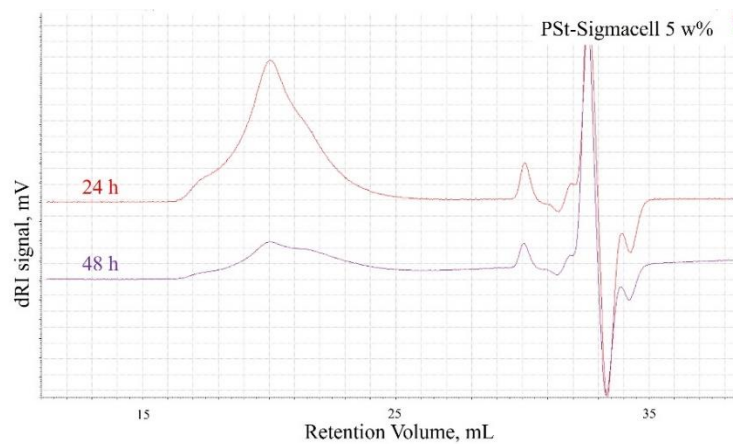

**Figure S13.** SEC chromatograms of PSt samples extracted from Sigmacell-m based semi-IPN with 5 w% of a filler. Extracted for 24 and 48 hours.

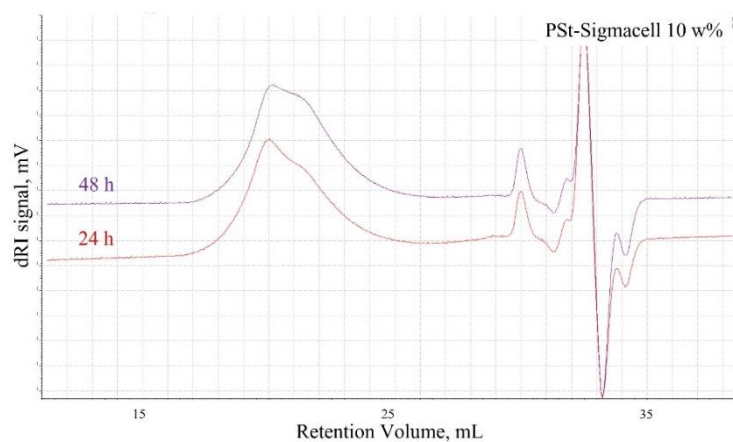

**Figure S14.** SEC chromatograms of PSt samples extracted from Sigmacell-m based semi-IPN with 10 w% of a filler. Extracted for 24 and 48 hours.



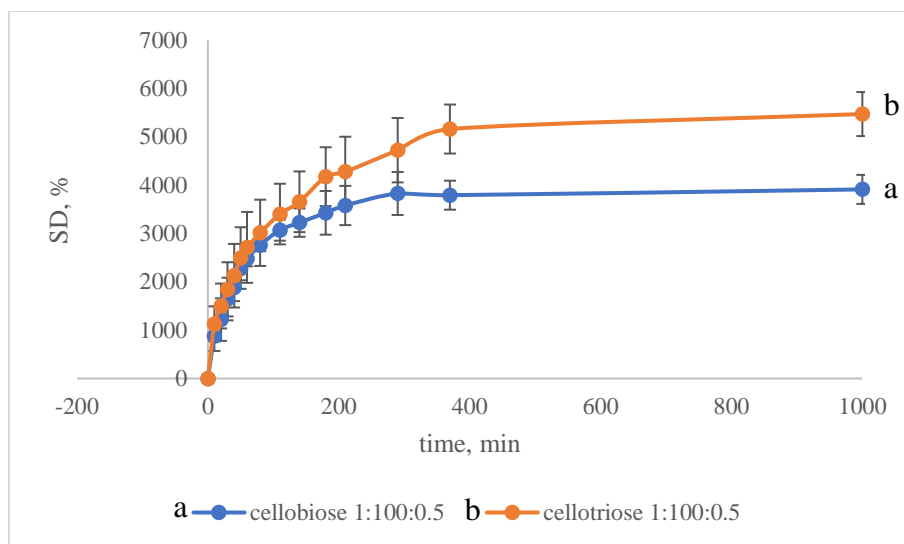

**Figure S15.** Swelling degree (SD, %) of PSt gels containing multi-functional cellobiose-m (a) and cellotriose-m (b) as crosslinks.

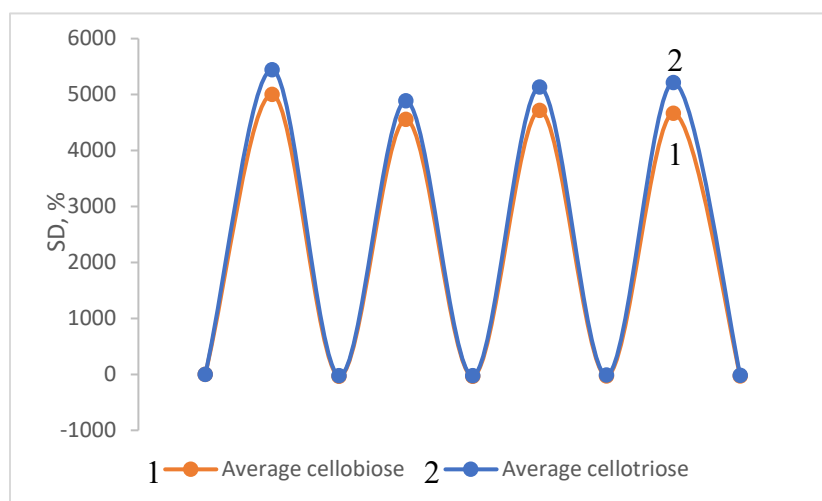

**Figure S16.** Swelling/deswelling capabilities of networks with cellobiose-m (1) and cellotriose-m (2). Four cycles are shown.

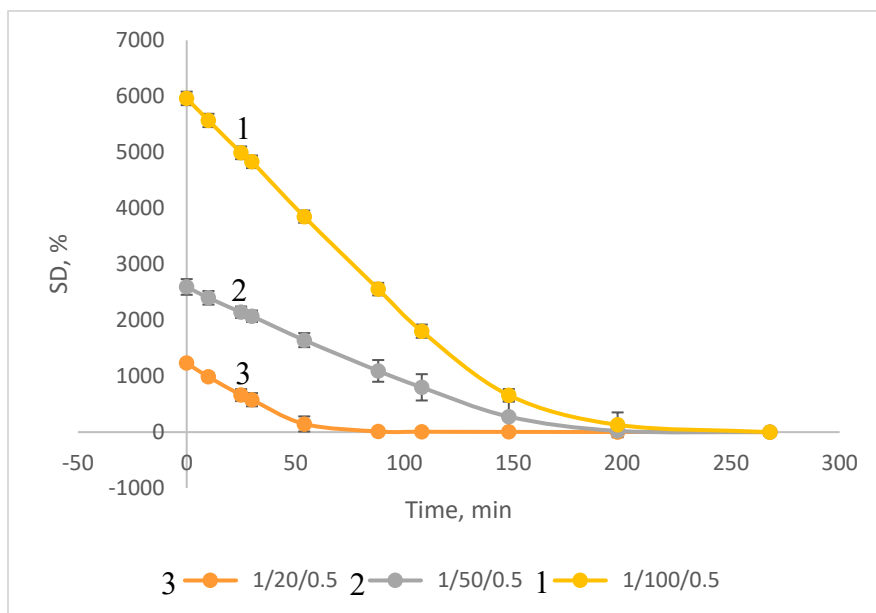

**Figure S17.** Deswelling of the gel with different components ratio. 1) 1/100/0.5; 2) 1/50/0.5; 3) 1/20/0.5

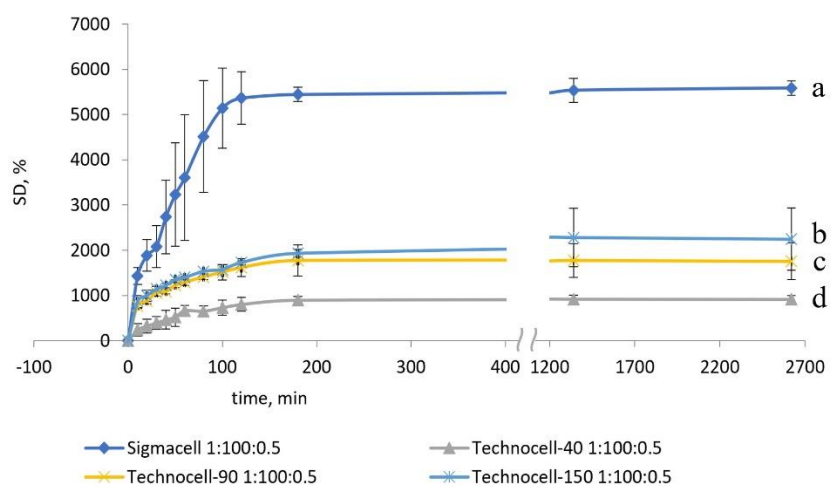

**Figure S18.** SD of the CNF-m gels formed with the same reagents' ratio. a) Sigmacell 1:100:0.5; b) Technocell-150 1:100:0.5; c) Technocell-90 1:100:0.5; d) Technocell-40 1:100:0.5.

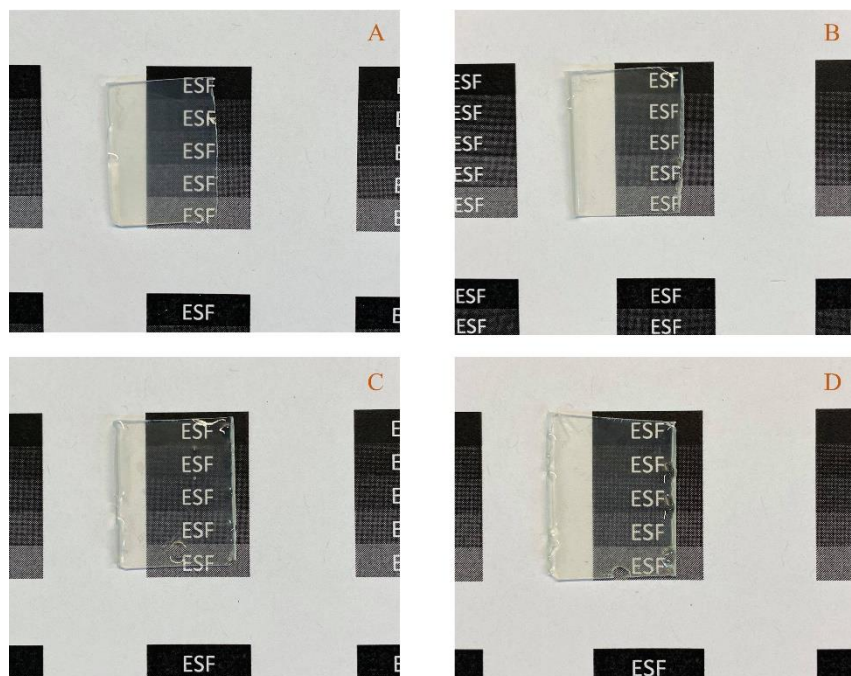

**Figure S19.** Opacity of PSt/cellulose composites. Material thickness -1.5 mm. A) Sigmacell-m composite, B) T-40-m composite, C) T-90-m composite, D) T-150-m composite.

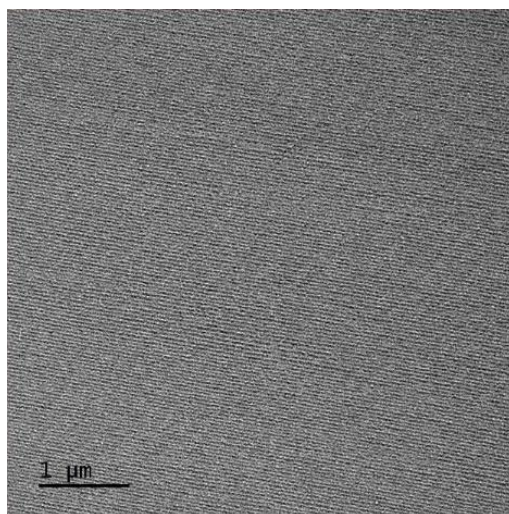

**Figure S20.** Transmission electron micrograph of PSt, stained with 2% uranyl acetate, magnification 8000 $\times$ .

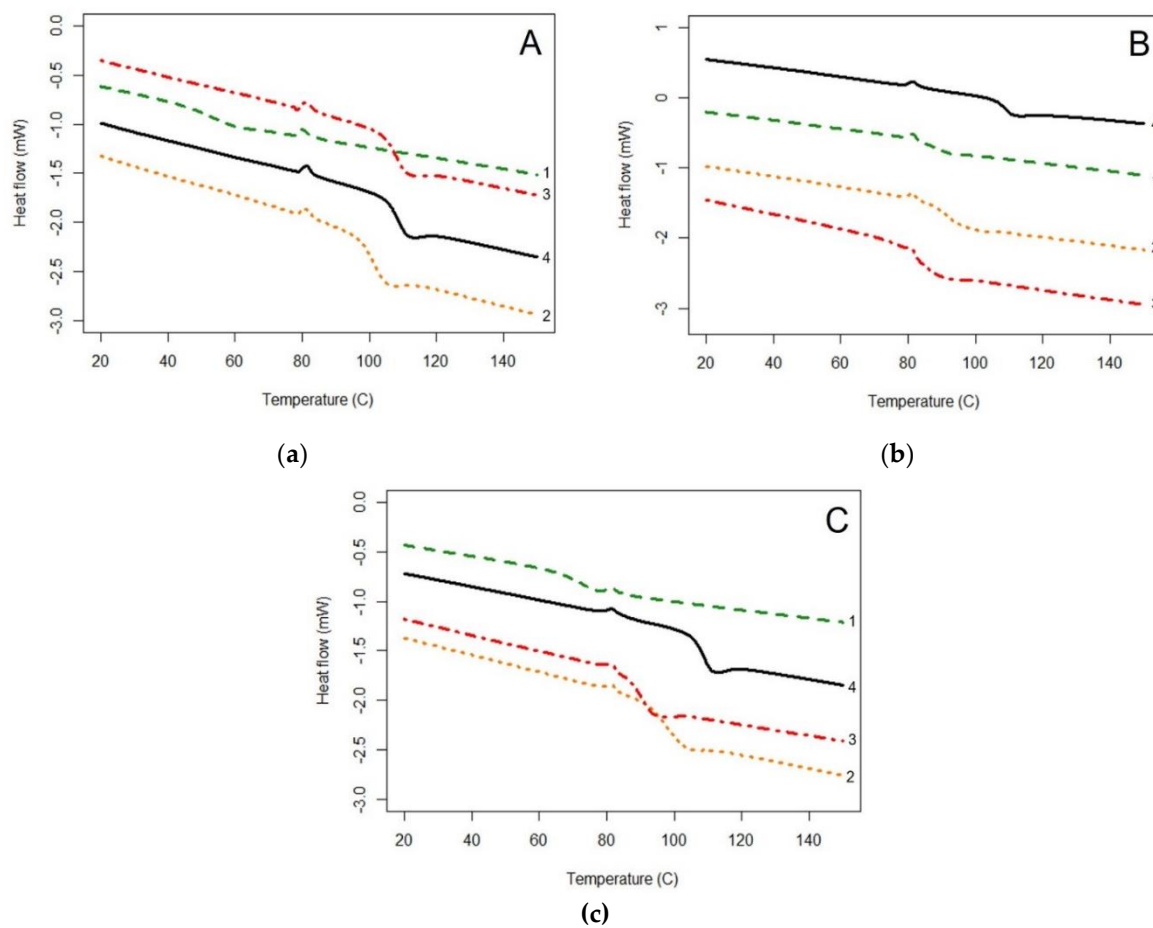

**Figure S21.** DSC thermograms of synthesized materials: A) cellobiose-m materials; B) cellotriose-m materials; C) Sigmacell-m materials. Numbers indicate: (1) linear poly(styrene) extracted from the corresponding network, (2) filler/poly(styrene) mixture, (3) not extracted semi-IPN, (4) Extracted network.
